# Supplementary material
Source: PubMed Central journal article supplement (PMC5960330)

## Supplementary Information for

### **Revisiting the role of IRF3 in inflammation and immunity by conditional and specifically targeted gene ablation in mice**

Hideyuki Yanai, Shiho Chiba, Sho Hangai, Kohei Kometani, Asuka Inoue, Yoshitaka Kimura, Takaya Abe, Hiroshi Kiyonari, Junko Nishio, Naoko Taguchi-Atarashi, Yu Mizushima, Hideo Negishi, Rudolf Grosschedl and Tadatsugu Taniguchi

Tadatsugu Taniguchi  
Email: [tada@m.u-tokyo.ac.jp](mailto:tada@m.u-tokyo.ac.jp)

#### **This PDF file includes:**

Supplementary text  
Figs. S1 to S5  
References for SI reference citations

## Supplementary Information Text

### SI Materials and Methods

**Construction of the targeting vector and generation of *Irf3* floxed mice.** The preparation of the targeting vector, isolation of homologous recombinant embryonic stem cells, and derivation of *Irf3*-floxed mice (accession number CDB1028K: <http://www2.clst.riken.jp/arg/mutant%20mice%20list.html>) were performed as described previously (<http://www2.clst.riken.jp/arg/Methods.html>). The neomycin resistance gene was deleted from the mouse genome by crossing *Irf3*-floxed mice with *FLPe* transgenic mice. To obtain *Irf3*<sup>-/-</sup> mice, *Irf3*-floxed mice were crossed with *CAG-Cre* transgenic mice. Then, mice in the next generation were crossed with WT mice to delete the *CAG-Cre* transgene.

**Southern blot analysis.** Southern blot analysis was performed according to standard protocol. Briefly, genomic DNA from tail was isolated with the DNeasy Tissue kit (Qiagen) and digested with *ScaI* or *NdeI* (TaKaRa). The digested DNA (10 µg) was separated on a 0.8% agarose gel, hydrolyzed in 0.25 M HCl (Wako Chemical) for 20 min, neutralized in 0.4 M NaOH (Nacalai Tesque) for 20 min and transferred onto a nylon membrane Hybond N+ (GE Healthcare Life Sciences) using top to bottom blotting overnight (0.4 M NaOH). The DNA probe was generated by polymerase chain reaction (PCR) with primer set. The following primers were used: 5'-gtagctgtagctgcaggtctttgc -3' (sense) and 5'-cagatgggaagactgagcctttag -3' (anti-sense). The amplified DNA fragments were labeled with [<sup>32</sup>P]-dCTP (10 mCi/mL; PerkinElmer, USA) using BcaBEST labeling kit (TaKaRa, Japan) and purified with Probe Quant G-50 Micro Columns (GE Healthcare Life Sciences). The DNA membrane was pre-hybridized in ULTRAhyb ultrasensitive hybridization buffer (Thermo Fisher Scientific) at 42 °C for one hour. The membrane was then hybridized with radioactive probe in ULTRAhyb buffer at 42°C for 24 hours. After hybridization,

membranes were washed twice in  $2 \times$  SSC/0.1% SDS at 42°C for 5 min, washed three times in  $0.1 \times$  SSC/0.1% SDS at 42°C for 15 min, and then exposed to an X-ray film RX-U (Fuji Film).

**Immunoblot analysis.** Cell extracts were prepared with lysis buffer (50 mM Tris-HCl (pH 7.4), 500 mM NaCl, 20 mM  $\beta$ -glycerophosphate, 2 mM EDTA, 1.5% NP-40, 1 mM  $\text{Na}_3\text{VO}_4$ , 200  $\mu\text{M}$  dithiothreitol, 10  $\mu\text{g}/\text{mL}$  aprotinin, 10  $\mu\text{g}/\text{mL}$  leupeptin and 1 mM p-amidinophenylmethanesulfonyl fluoride). Samples were separated by 12.5% acrylamide gel electrophoresis and transferred to polyvinylidene difluoride (PVDF) membrane. Anti-IRF3 antibody (Thermo Fisher Scientific) and anti- $\beta$ -actin antibody (AC-15; Sigma-Aldrich) were used for immunoblotting.

**RNA analysis.** Total RNA extraction and cDNA synthesis were performed as described previously (1-3). Quantitative real-time PCR analysis was performed using LightCycler480 and the SYBR Green system (Roche). The primer sequences for *Gapdh*, *Ifnb*, *Il6*, *Il12b*, *iNOS*, and *Arg1* mRNA have been described (1-3). The primers for *Bcl2l12* were as follows: 5'- ggttctgacggccttcctta -3' (sense) and 5'- gcaaccagggcataagaactc -3' (anti-sense). All experiments were performed more than three times and data are presented as relative expression units after normalization to *Gapdh* mRNA expression level.

**Cell death assay.** MEFs were washed with phosphate buffered saline, irradiated with UV (254 nm, 200  $\text{J}/\text{m}^2$ ) using UV cross-linker CL-100 (UVP), and then cultured for 18 hours. All cells were harvested, stained with Annexin V-APC apoptosis detection kit (BD Pharmingen), and then analyzed by flow cytometry.

**Flow cytometric analysis.** Flow cytometric analysis was performed using an LSRII Fortessa flow cytometer (BD Biosciences) as described previously (1, 3). The following antibodies were purchased and used: FITC, PE, Pacific Blue, APC, or PE-Cy7 anti-B220 mAb (Biolegend, RA3-6B2); PE anti-BP-1 mAb (Biolegend, 6C3); APC anti-CD43 mAb (Biolegend, S11); eFluor 450 anti-CD24 mAb (eBioscience, M1/69); FITC or APC anti-IgM mAb (Biolegend, R6-60.2); PE anti-CD25 mAb (BD Pharmingen, PC61); APC anti-c-kit mAb (Biolegend, 2B8); Pacific Blue anti-CD19 mAb (Biolegend, 6D5); FITC or PE anti-CD3 mAb (BD Biosciences, 145-2C11); PE anti-AA4.1 mAb (Biolegend, AA4.1); FITC, PE or APC anti-CD11b mAb (BD Pharmingen, M1/70); PE-Cy7 anti-Gr-1 mAb (Biolegend, RB6-8C5); PE anti-Fas mAb (eBioscience, 15A7); APC anti-GL7 mAb (eBioscience, GL-7); Alexa Fluor 647 anti-CD23 mAb (Biolegend, B3B4); eFluor 450 anti-IgD mAb (eBioscience, 11-26c); FITC anti-CD23 mAb (BD Pharmingen, B3B4); APC anti-NKp46 mAb (Biolegend, 29A1.4); FITC anti-CD11c mAb (Biolegend, N418); PE anti-CD21 mAb (Biolegend, 7E9); FITC anti-Ig light chain  $\kappa$  mAb (Biolegend, RMK-45); PE anti-Ig light chain  $\lambda$  mAb (Biolegend, RML-42); PerCP-Cy5.5 anti-F4/80 mAb (Biolegend, BM8); APC anti-CD138 mAb (Biolegend, 281-2); Alexa Fluor 488 or PE anti-CD45 mAb (Biolegend, IM7); FITC or PerCP anti-CD8 mAb (Biolegend, 53-6.7); FITC anti-IFN- $\gamma$  mAb (Biolegend, XMG1.2); Pacific Blue or APC anti-TCR $\beta$  mAb (Biolegend, H57-597); PerCP-Cy5.5 anti-CD62L mAb (Biolegend, MEL-14); PE-Cy7 anti-CD4 mAb (Biolegend, GK1.5); APC anti-FoxP3 mAb (eBioscience, FJK-16s).

**Viral and bacterial infections.** VSV, HSV-1, EMCV and *L. monocytogenes* were prepared as described previously (3-6). Mice were intravenously infected with  $10^5$  pfu of EMCV and blood then collected at 6 hours after infection. For *in vitro* infection, cultured cells were infected with viruses or bacteria at a multiplicity of infection (MOI) of 1 for the indicated time periods.

**Enzyme-linked immunosorbent assay (ELISA).** Mouse IFN- $\beta$  was measured using ELISA kit from PBL Assay Science, according to the manufacturer's protocol. Anti-OVA and anti-TNP ELISA were performed using standard procedures using OVA (Sigma Aldrich) or TNP-BSA (Biosearch Technologies) with SBA clonotyping system-C57BL/6-HRP (SouthernBiotech) (7).

**LPS-induced lethal shock.** Mice were injected intraperitoneally with LPS (8 mg/kg weight) and monitored every 12 hours. Whole blood samples were taken sequentially from tails, incubated at room temperature for 30 min, and centrifuged for 5 min (4 °C at 8,000 rpm) to prepare sera.

**Macrophage differentiation study.** BMMs were seeded at  $2.5 \times 10^5$  cells/well in 48-well plates for overnight. Cells were treated as described previously (3, 8). Briefly, for M1 macrophage differentiation, LPS (50 ng/ml) and IFN- $\gamma$  (100 ng/ml; R&D systems); for M2a differentiation, IL-4 (20 ng/ml; Peprotech). Seven hours after treatment, cells were harvested and total RNA extracted.

**Immunization and antibody production assay.** For immunizations, mice were intraperitoneally injected with 100  $\mu$ g of OVA emulsified at 1:1 (vol/vol) ratio with complete Freund's adjuvant (CFA; BD Difco), 50  $\mu$ g of TNP-AECM-Ficoll (Biosearch Technologies) in PBS, or TNP-LPS (Biosearch Technologies) in PBS. Sera were collected at 3 weeks post injections.

***In vitro* T cell differentiation.** For *in vitro* T cell differentiation, naïve CD4<sup>+</sup> T cells were isolated from spleen using naïve CD4<sup>+</sup> T cell isolation kit (Miltenyi Biotec). The cells ( $1 \times 10^5$  cells) were cultured on plates pre-coated with anti-CD3 $\epsilon$  (2  $\mu$ g/ml; 145-2C11, Biolegend) and anti-CD28 (2

µg/ml; 37.51, Biolegend) mAbs in the presence of either IL-2 (20 ng/ml; Peprotech), anti-IL-4 mAb (10 µg/ml; 11B11, Biolegend), and anti-IFN-γ mAb (10 µg/ml; Biolegend, XMG1.2) (Th0); IL-2 (20 ng/ml), anti-IL-4 mAb (10 µg/ml), and IL-12 (10 ng/ml; Peprotech) (Th1); IL-2 (20 ng/ml), anti-IFN-γ mAb (10 µg/ml), IL-4 (10 ng/ml; Peprotech) and anti-CD28 mAb (2 µg/ml) (Th2); IL-2 (20 ng/ml), anti-IL-4 mAb (10 µg/ml), anti-IFN-γ mAb (10 µg/ml), IL-6 (20 ng/ml; R&D systems, USA), TGF-β (1 ng/ml; Peprotech), IL1-β (50 ng/ml; Peprotech) and IL-12 (5 ng/ml) (Th17); and IL-2 (20 ng/ml), TGF-β (15 ng/ml), anti-IL-4 mAb (10 µg/ml), anti-IFN-γ mAb (10 µg/ml) (Treg) for 5 days. After the culture period, cells were treated with PMA (50 ng/ml; Sigma-Aldrich), ionomycin (1 µg/ml; Sigma-Aldrich) and golgi stop (BD Biosciences) for 4 hours. Then, cells were harvested, stained with monoclonal antibodies using intracellular fixation & permeabilization buffer set (eBioscience) with PE-Cy7 anti-CD4 mAb, FITC anti-IFN-γ mAb (Biolegend, XMG1.2), PerCp-Cy5.5 anti-IL-17 mAb (Biolegend, TC11-18H10.1) or Alexa Fluor 700 anti-FoxP3 (eBioscience, FJK-16s), and then analyzed by flow cytometry.

***In vivo* tumor growth.** B16F10 cells ( $1 \times 10^5$  cells) were inoculated subcutaneously into mice as described previously (9). Tumor volume was calculated as  $ab^2/2$  by measuring longer axes (a) and shorter axes (b) of the tumor every 3 or 4 days. Immune cells in tumor were analyzed by flow cytometry on day 17 after tumor inoculation.

**Statistical analysis.** Differences between control and experimental groups were evaluated with Student's *t*-test or F-test.

## SI Figure legends

### **Fig. S1. Generation of *Irf3* gene conditional knock-out mice and UV-induced apoptosis in WT**

**and *Irf3*<sup>-/-</sup> MEFs.** (A) Genomic structure of the mouse *Irf3* gene and the targeting vector are shown.

Exons 2 through 4 were flanked by two loxP sequences. Two frt sequences were introduced to flank the *neo* gene. (B) Tail genomic DNA was isolated from WT and *Irf3*<sup>WT/f</sup> mice, digested with *ScaI* restriction enzyme, electrophoresed, transferred to nylon membrane, and hybridized with the probes indicated in A.

(C) Genomic DNA extracted from tails of WT or *Irf3*<sup>fl/fl</sup>-*CAG-Cre*<sup>+</sup> mice was digested with *NdeI* restriction enzyme, and subjected to Southern blot analysis. (D and E) WT and littermate *Irf3*<sup>-/-</sup>*Bcl2l12*<sup>-/-</sup> (D) or *Irf3*<sup>-/-</sup> mouse embryonic fibroblasts (MEFs) (E) were left untreated or irradiated with UV (254 nm, 200 J/m<sup>2</sup>).

Eighteen hours after the irradiation, cells were stained with APC-conjugated Annexin-V and were subjected to flow cytometer analysis. Percentage of APC-Annexin-V-positive cells (gray) is shown. More than three independent experiments were performed with representative data shown.

**Fig. S2. Induction of *Il6*, *Rantes* and *Il12b* mRNA in WT and *Irf3*<sup>-/-</sup> cells in response to PRR ligands.** (A–F) BM-DCs (A, C, E), or BMMs (B, D, F) from WT and littermate *Irf3*<sup>-/-</sup> mice were stimulated with poly (I:C) (10 µg/ml), B-DNA (10 µg/ml), LPS (200 ng/ml), or CpG-B ODN (1 µM) for the indicated time periods. *Il6* (A, B), *Rantes* (C, D), and *Il12b* (E, F) mRNA expression levels were examined by qRT-PCR analysis. \**P* < 0.05. Results shown are means ± s.d. of three independent experiments. (G) Bone marrow cells were prepared from WT and *Irf3*<sup>-/-</sup> mice and differentiated into macrophages (M0, M1, M2a) as described previously (3, 8). *Il12b* (left panel), *iNOS* (middle panel), and *Arg1* (right panel) mRNA expression levels were measured by qRT-PCR analysis. \**P* < 0.05. Data are shown as means ± s.d. of triplicate determinants.



**Fig. S3. Normal tumor-infiltrating immune cells in tumor-bearing *Irf3*<sup>-/-</sup> mice.** WT (n = 6) and *Irf3*<sup>-/-</sup> (n = 7) were subcutaneously inoculated with B16F10 cells ( $1 \times 10^5$  cells). Tumor-infiltrating immune cells in *Irf3*<sup>-/-</sup> mice were analyzed by flow cytometry on day 17 after tumor inoculation. Data are shown as a percentage of CD45<sup>+</sup> cells. Data are shown as means  $\pm$  s.d.

**Fig. S4. B cell populations in tissues from WT and *Irf3<sup>fl/fl</sup>-Mbl-Cre<sup>+</sup>* mice.** (A) CD19<sup>+</sup>CD3<sup>-</sup> B cells in the spleen (upper left panel), blood (upper right panel), mesenteric lymph nodes (mLNs; lower left panel), and Peyer's patches (PPs; lower right panel) from WT and *Irf3<sup>fl/fl</sup>-Mbl-Cre<sup>+</sup>* mice were analyzed by flow cytometry. Percentages of cells in the total population are shown. (B) Splenocytes were prepared from WT and *Irf3<sup>fl/fl</sup>-Mbl-Cre<sup>+</sup>* mice and analyzed by flow cytometry. AA4.1<sup>+</sup>B220<sup>+</sup> cells (upper left panel), B220<sup>+</sup> cells (upper right panel), and CD19<sup>+</sup> cells (lower right panel) were gated, respectively. Percentages of cells in the total or gated population are shown. MZ, marginal zone B cells. Fo, follicular B cells. P, plasma B cells. GC, germinal center B cells. (C) Splenocytes were prepared from WT and *Irf3<sup>fl/fl</sup>-Mbl-Cre<sup>+</sup>* mice and subjected to flow cytometry analysis. Percentages of cells in the total population are shown. (D) Peritoneal exudate cells from WT and *Irf3<sup>fl/fl</sup>-Mbl-Cre<sup>+</sup>* mice were analyzed by flow cytometry (upper panel). Percentages of B1 and B2 B cells in the total population are shown. CD19<sup>+</sup>GL7<sup>+</sup>Fas<sup>+</sup> germinal center B cells in mLNs (lower left panel) or PPs (lower right panel) from WT and *Irf3<sup>fl/fl</sup>-Mbl-Cre<sup>+</sup>* mice were analyzed by flow cytometry. Percentages of cells in the gated population are shown. All results shown are representative of three independent experiments.

**Figure S5. Abnormal T cell populations in the thymus and spleen from *Irf3<sup>fl/fl</sup>-Lck-Cre<sup>+</sup>* mice.**

(A) Naïve CD4<sup>+</sup> T cells in spleen of WT and *Irf3<sup>fl/fl</sup>-Lck-Cre<sup>+</sup>* mice were purified, differentiated into T helper (Th) 1 (upper left panel), Th2 (lower left panel), Th17 (upper right panel) or *in vitro* induced Treg (iTreg; lower right panel) cells, and analyzed by flow cytometry. Percentages of differentiated T cells in the total CD4<sup>+</sup> T cell population are shown. (B) Thymocytes from WT and *Irf3<sup>fl/fl</sup>-Lck-Cre<sup>+</sup>* mice were analyzed by flow cytometry. Percentages of CD4<sup>+</sup>CD8<sup>+</sup> and CD4<sup>-</sup>CD8<sup>-</sup> cells in the total cell population are shown. (C) Splenocytes from WT and *Irf3<sup>fl/fl</sup>-Lck-Cre<sup>+</sup>* mice were analyzed by flow cytometry. CD4<sup>+</sup>TCRβ<sup>+</sup> cells (left panel) and CD8<sup>+</sup>TCRβ<sup>+</sup> cells (right panel) were gated, respectively. Percentages of CD44<sup>-</sup>CD62L<sup>+</sup> naïve T cells and effector/memory T cells including CD44<sup>int-hi</sup>CD62L<sup>-</sup> and CD44<sup>+</sup>CD62L<sup>+</sup> cells in the gated population are shown. (D) Naïve T cells and effector/memory T cells in peripheral blood from WT and *Irf3<sup>fl/fl</sup>-Lck-Cre<sup>+</sup>* mice were analyzed by flow cytometry as in C. All results shown are representative of three independent experiments.

## References

1. Hangai S, *et al.* (2016) PGE2 induced in and released by dying cells functions as an inhibitory DAMP. *Proc. Natl. Acad. Sci. USA* 113(14):3844-3849.
2. Yanai H, *et al.* (2009) HMGB proteins function as universal sentinels for nucleic-acid-mediated innate immune responses. *Nature* 462(7269):99-103.
3. Yanai H, *et al.* (2013) Conditional ablation of HMGB1 in mice reveals its protective function against endotoxemia and bacterial infection. *Proc. Natl. Acad. Sci. USA* 110(51):20699-20704.
4. Honda K, *et al.* (2005) IRF-7 is the master regulator of type-I interferon-dependent immune responses. *Nature* 434(7034):772-777.
5. Sato M, *et al.* (2000) Distinct and essential roles of transcription factors IRF-3 and IRF-7 in response to viruses for IFN- $\alpha/\beta$  gene induction. *Immunity* 13(4):539-548.
6. Yanai H, *et al.* (2007) Role of IFN regulatory factor 5 transcription factor in antiviral immunity and tumor suppression. *Proc. Natl. Acad. Sci. USA* 104(9):3402-3407.
7. Savitsky DA, Yanai H, Tamura T, Taniguchi T, & Honda K (2010) Contribution of IRF5 in B cells to the development of murine SLE-like disease through its transcriptional control of the *IgG2a* locus. *Proc. Natl. Acad. Sci. USA* 107(22):10154-10159.
8. Luo C, Chen M, Madden A, & Xu H (2012) Expression of complement components and regulators by different subtypes of bone marrow-derived macrophages. *Inflammation* 35(4):1448-1461.
9. Kimura Y, *et al.* (2016) The innate immune receptor Dectin-2 mediates the phagocytosis of cancer cells by Kupffer cells for the suppression of liver metastasis. *Proc. Natl. Acad. Sci. USA* 113(49):14097-14102.

Figure S1

A

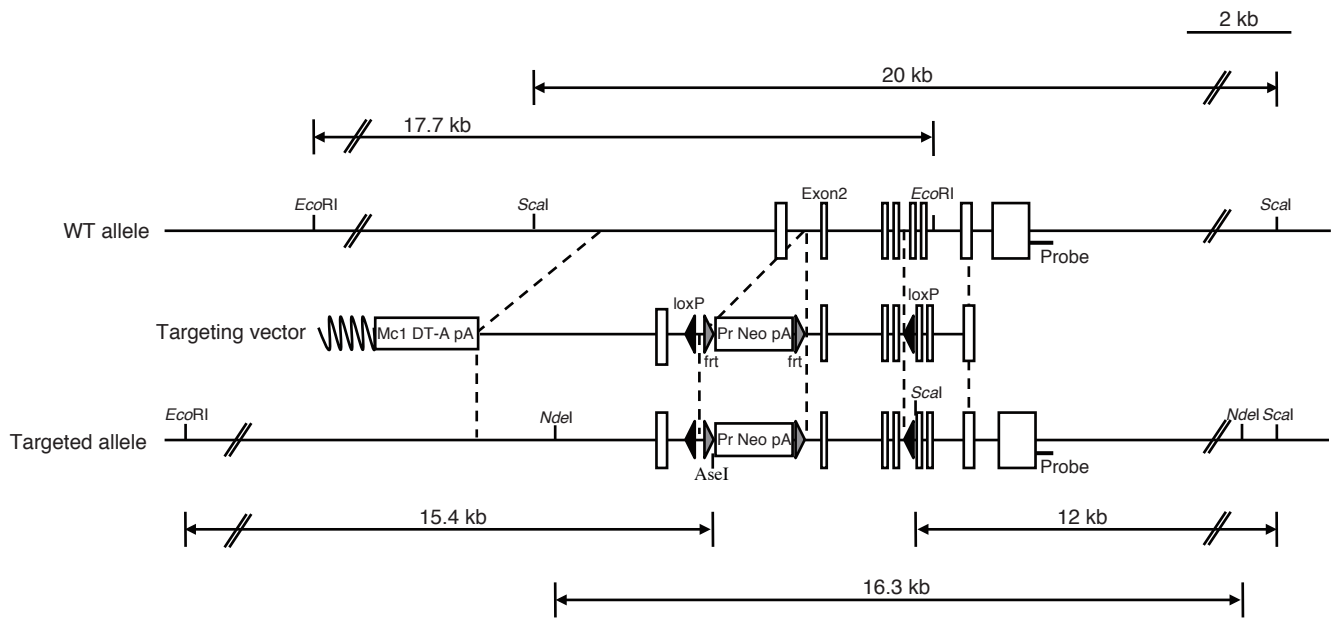

B

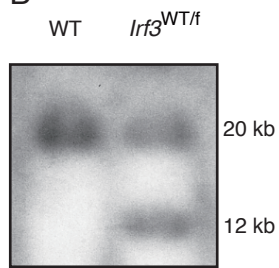

C

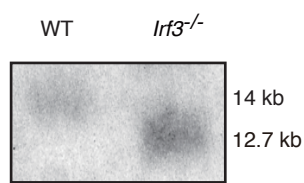

D

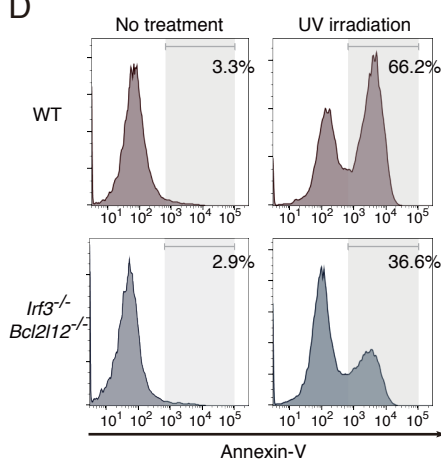

E

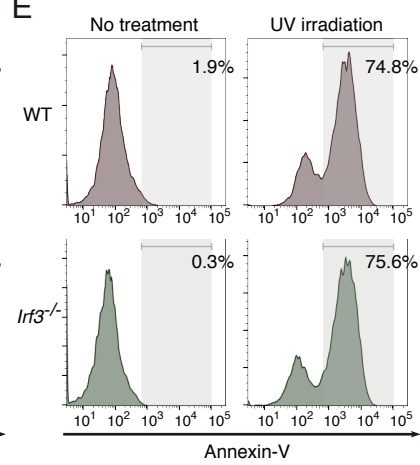

# Figure S2

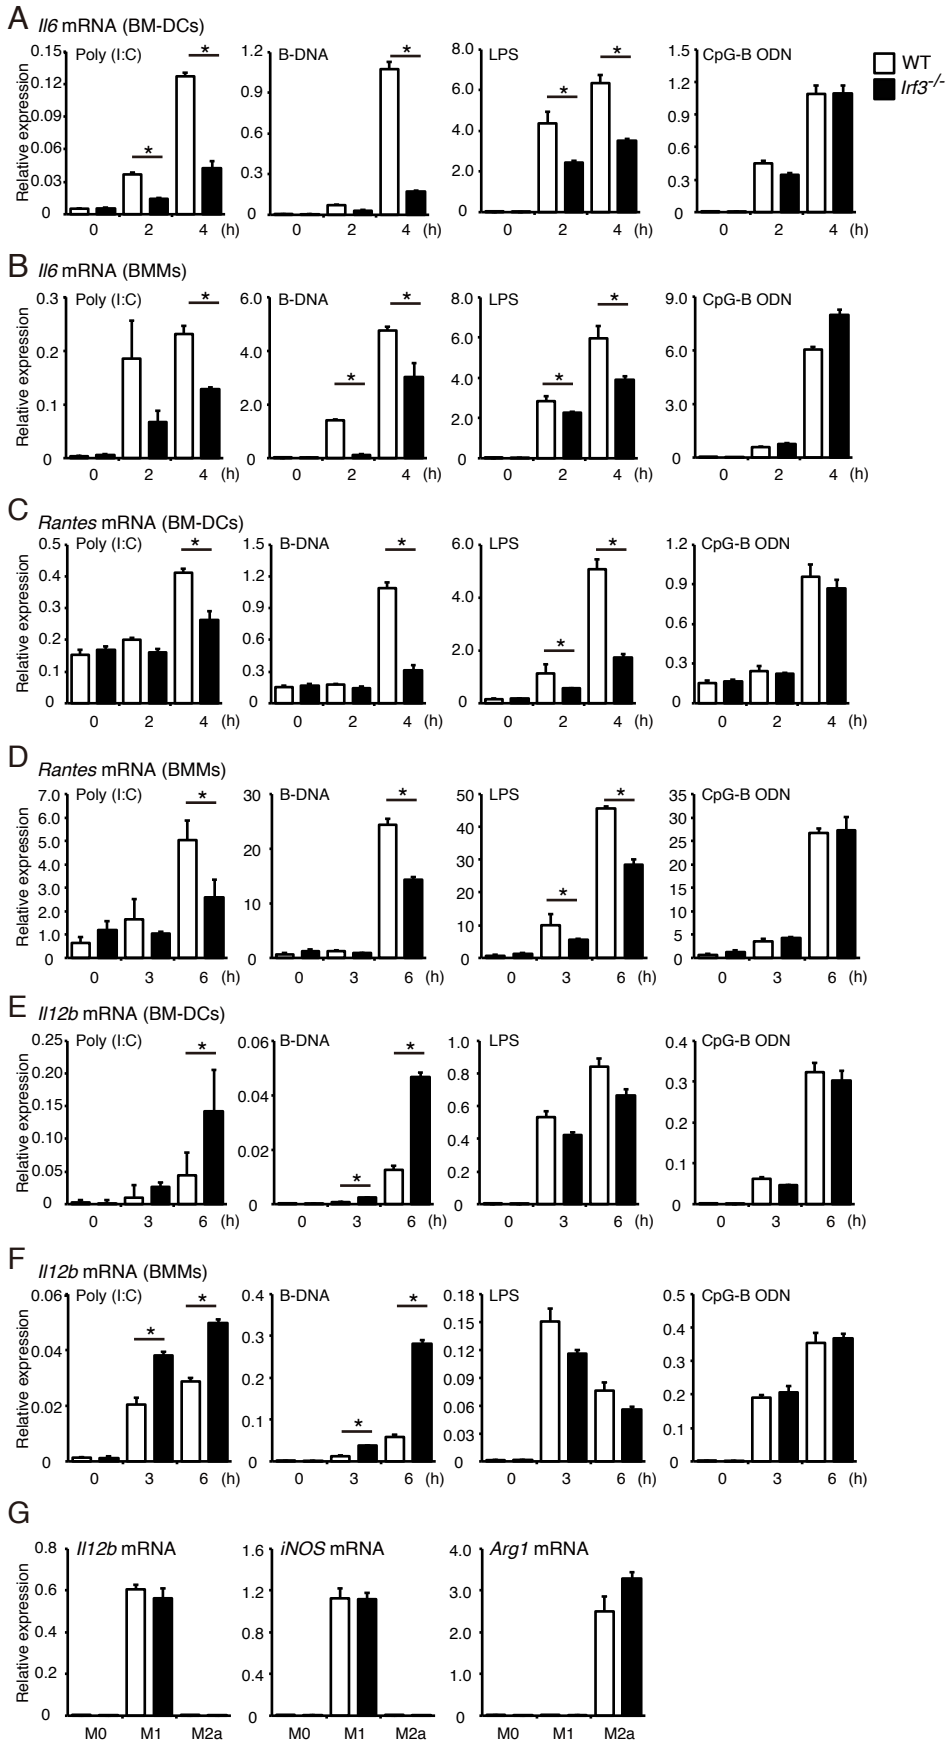

Figure S3

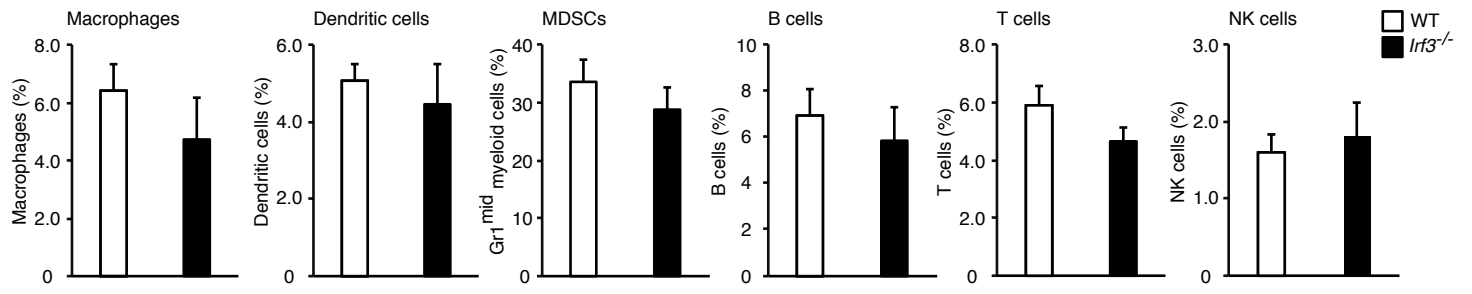

Figure S4

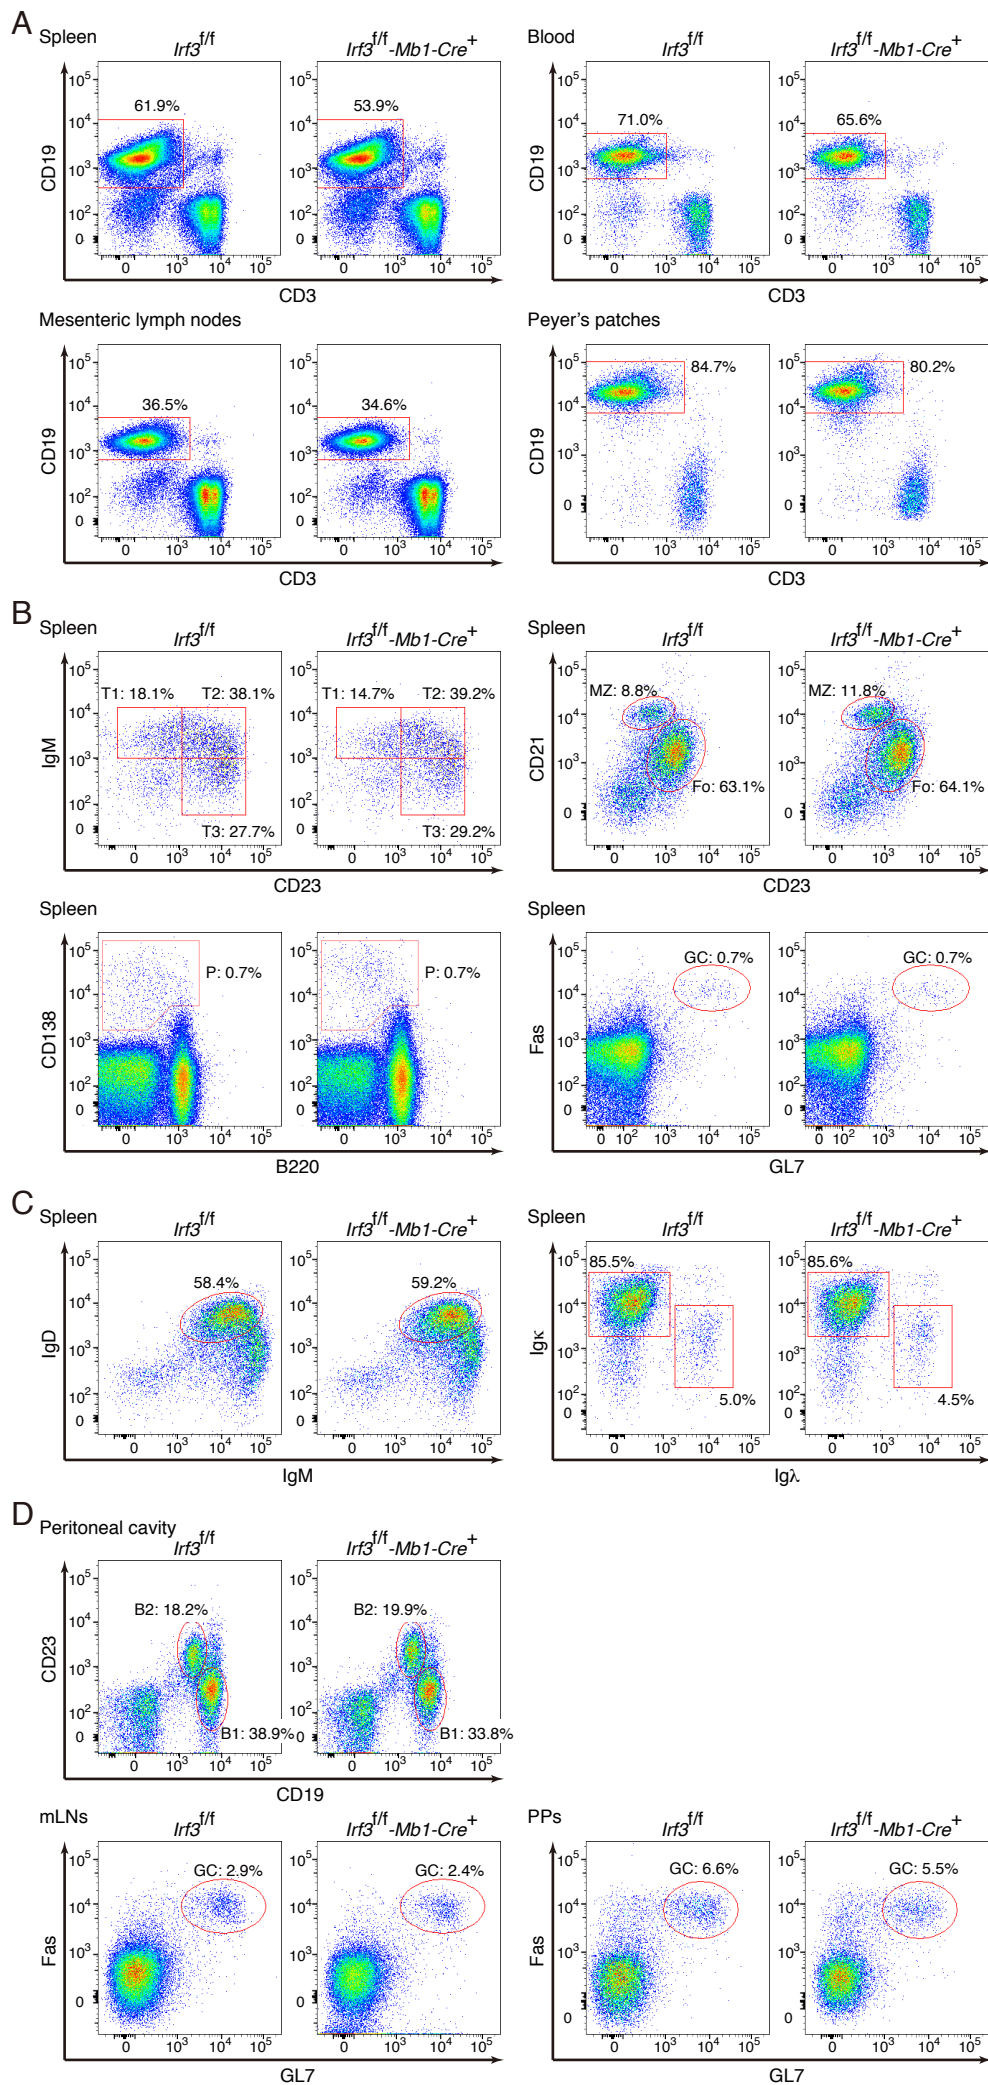



Figure S5

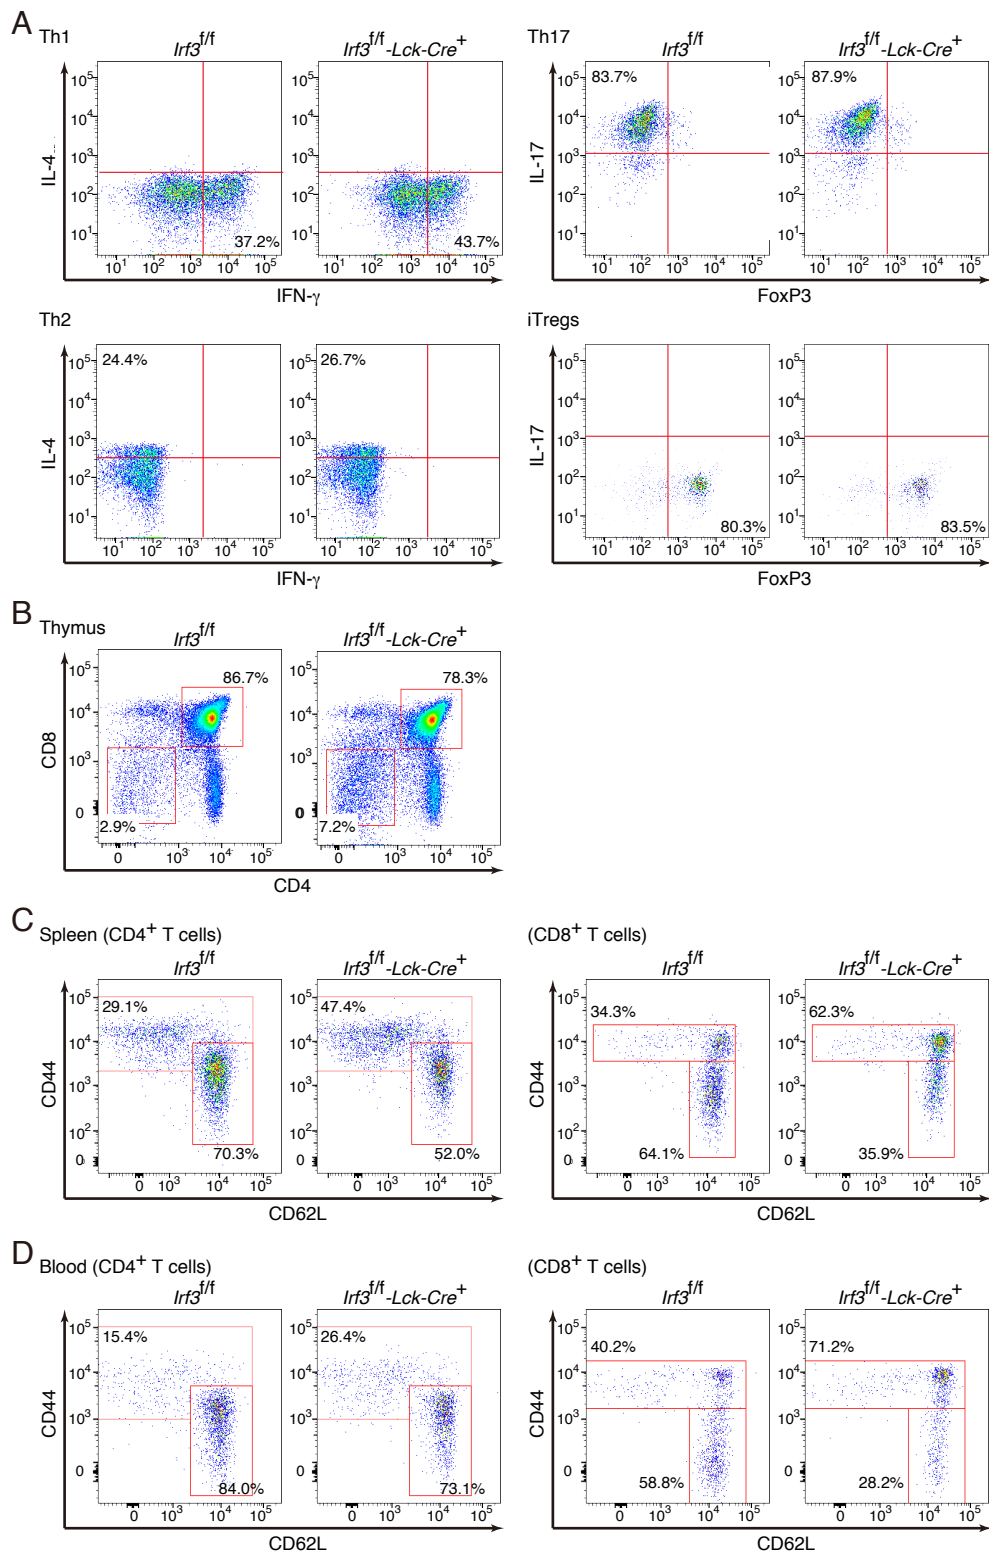

Supplement: pnas.1803936115.sapp.pdf [file pnas.1803936115.sapp.pdf]
